# Supplementary material for: Evaluation of the Usefulness of Sorbents in the Remediation of Soil Exposed to the Pressure of Cadmium and Cobalt
Source: MDPI journal article supplement (doi:10.3390/ma15165738), 2022-08-19
Supplement: s1 [file s1]

# Evaluation of the usefulness of sorbents in the remediation of soil exposed to the pressure of cadmium and cobalt

Jadwiga Wyszowska \*, Agata Borowik, Magdalena Zaborowska and Jan Kucharski

Department of Soil Science and Microbiology, University of Warmia and Mazury in Olsztyn, Plac Łódzki 3,  
10-727 Olsztyn, Poland

\* Correspondence: [jadwiga.wyszowska@uwm.edu.pl](mailto:jadwiga.wyszowska@uwm.edu.pl)

**Table S1.** The number of organotrophic bacteria,  $10^9$  cfu  $\text{kg}^{-1}$  d.m. of soil

| Object          | C0                   | Cd                    | Co                    |
|-----------------|----------------------|-----------------------|-----------------------|
| Control         | 30.615 <sup>cd</sup> | 21.002 <sup>hi</sup>  | 23.023 <sup>f-i</sup> |
| Molecular sieve | 41.609 <sup>a</sup>  | 30.073 <sup>c-e</sup> | 33.524 <sup>c</sup>   |
| Halloysite      | 32.784 <sup>c</sup>  | 21.643 <sup>g-i</sup> | 21.593 <sup>g-i</sup> |
| Sepiolite       | 33.031 <sup>c</sup>  | 19.079 <sup>i</sup>   | 18.635 <sup>i</sup>   |
| Expanded clay   | 34.411 <sup>bc</sup> | 32.834 <sup>c</sup>   | 24.699 <sup>f-h</sup> |
| Biochar         | 38.207 <sup>ab</sup> | 22.037 <sup>g-i</sup> | 19.819 <sup>i</sup>   |
| Zeolite         | 32.932 <sup>c</sup>  | 27.657 <sup>d-f</sup> | 25.685 <sup>e-g</sup> |

C0 – uncontaminated soil, Cd – cadmium ion, Co – cobalt ion. Homogeneous groups denoted with letters (a-i).

**Table S2.** The number of actinomycetes,  $10^9$  cfu  $\text{kg}^{-1}$  d.m. of soil

| Object          | C0                    | Cd                    | Co                    |
|-----------------|-----------------------|-----------------------|-----------------------|
| Control         | 16.170 <sup>g-j</sup> | 15.875 <sup>h-k</sup> | 13.410 <sup>j-l</sup> |
| Molecular sieve | 17.354 <sup>e-h</sup> | 29.136 <sup>a</sup>   | 17.008 <sup>f-i</sup> |
| Halloysite      | 20.410 <sup>c-e</sup> | 12.966 <sup>kl</sup>  | 10.599 <sup>l</sup>   |
| Sepiolite       | 20.854 <sup>cd</sup>  | 19.276 <sup>d-f</sup> | 13.459 <sup>j-l</sup> |
| Expanded clay   | 22.530 <sup>bc</sup>  | 17.501 <sup>e-h</sup> | 19.720 <sup>c-f</sup> |
| Biochar         | 19.276 <sup>d-f</sup> | 25.340 <sup>b</sup>   | 15.677 <sup>h-k</sup> |
| Zeolite         | 14.100 <sup>i-k</sup> | 19.128 <sup>d-g</sup> | 16.170 <sup>g-j</sup> |

C0 – uncontaminated soil, Cd – cadmium ion, Co – cobalt ion. Homogeneous groups denoted with letters (a-l).

**Table S3.** The number of fungi,  $10^7$  cfu  $\text{kg}^{-1}$  d.m. of soil

| Object          | C0                   | Cd                   | Co                   |
|-----------------|----------------------|----------------------|----------------------|
| Control         | 6.754 <sup>d-h</sup> | 5.522 <sup>h-k</sup> | 4.388 <sup>i</sup>   |
| Molecular sieve | 7.592 <sup>d-f</sup> | 6.508 <sup>e-i</sup> | 5.078 <sup>ik</sup>  |
| Halloysite      | 9.712 <sup>ab</sup>  | 7.494 <sup>def</sup> | 5.374 <sup>i-k</sup> |
| Sepiolite       | 7.099 <sup>d-g</sup> | 6.064 <sup>g-j</sup> | 5.669 <sup>h-k</sup> |
| Expanded clay   | 10.304 <sup>ab</sup> | 7.937 <sup>cd</sup>  | 7.789 <sup>c-e</sup> |
| Biochar         | 10.599 <sup>a</sup>  | 7.592 <sup>d-f</sup> | 6.409 <sup>f-j</sup> |
| Zeolite         | 8.973 <sup>bc</sup>  | 7.148 <sup>d-g</sup> | 5.423 <sup>h-k</sup> |

C0 – uncontaminated soil, Cd – cadmium ion, Co – cobalt ion. Homogeneous groups denoted with letters (a-k).

**Table S4.** Dehydrogenases activity,  $\mu\text{mol TPF} \cdot \text{h}^{-1} \cdot \text{kg}^{-1}$  d.m. of soil

| Object          | C0                  | Cd                   | Co                  |
|-----------------|---------------------|----------------------|---------------------|
| Control         | 6.231 <sup>c</sup>  | 1.002 <sup>g-i</sup> | 0.357 <sup>i</sup>  |
| Molecular sieve | 9.134 <sup>a</sup>  | 3.243 <sup>d</sup>   | 2.971 <sup>de</sup> |
| Halloysite      | 6.502 <sup>c</sup>  | 1.969 <sup>fg</sup>  | 1.358 <sup>gh</sup> |
| Sepiolite       | 6.564 <sup>c</sup>  | 1.154 <sup>g-i</sup> | 0.934 <sup>hi</sup> |
| Expanded clay   | 7.776 <sup>b</sup>  | 1.698 <sup>f-h</sup> | 0.900 <sup>hi</sup> |
| Biochar         | 6.927 <sup>bc</sup> | 2.343 <sup>ef</sup>  | 2.037 <sup>fg</sup> |
| Zeolite         | 9.694 <sup>a</sup>  | 1.222 <sup>gh</sup>  | 3.226 <sup>de</sup> |

C0 – uncontaminated soil, Cd – cadmium ion, Co – cobalt ion. Homogeneous groups denoted with letters (a-i).

**Table S5.** Catalase activity,  $\text{mol O}_2 \text{h}^{-1} \text{kg}^{-1}$  d.m. of soil

| Object          | C0                   | Cd                   | Co                   |
|-----------------|----------------------|----------------------|----------------------|
| Control         | 0.338 <sup>d-f</sup> | 0.293 <sup>k-m</sup> | 0.278 <sup>m</sup>   |
| Molecular sieve | 0.357 <sup>bc</sup>  | 0.327 <sup>e-h</sup> | 0.315 <sup>hij</sup> |
| Halloysite      | 0.364 <sup>ab</sup>  | 0.345 <sup>cd</sup>  | 0.319 <sup>g-i</sup> |
| Sepiolite       | 0.349 <sup>b-d</sup> | 0.342 <sup>c-e</sup> | 0.286 <sup>lm</sup>  |
| Expanded clay   | 0.342 <sup>c-e</sup> | 0.334 <sup>d-g</sup> | 0.293 <sup>k-m</sup> |
| Biochar         | 0.379 <sup>a</sup>   | 0.323 <sup>f-h</sup> | 0.304 <sup>i-k</sup> |
| Zeolite         | 0.375 <sup>a</sup>   | 0.342 <sup>c-e</sup> | 0.301 <sup>i-l</sup> |

C0 – uncontaminated soil, Cd – cadmium ion, Co – cobalt ion. Homogeneous groups denoted with letters (a-m).

**Table S6.** Urease activity,  $\text{mmol N-NH}_4 \text{h}^{-1} \text{kg}^{-1}$  d.m. of soil

| Object          | C0                  | Cd                   | Co                   |
|-----------------|---------------------|----------------------|----------------------|
| Control         | 0.223 <sup>c</sup>  | 0.146 <sup>f</sup>   | 0.116 <sup>g</sup>   |
| Molecular sieve | 0.254 <sup>ab</sup> | 0.162 <sup>d-f</sup> | 0.154 <sup>ef</sup>  |
| Halloysite      | 0.239 <sup>bc</sup> | 0.216 <sup>c</sup>   | 0.139 <sup>fg</sup>  |
| Sepiolite       | 0.239 <sup>bc</sup> | 0.185 <sup>d</sup>   | 0.162 <sup>d-f</sup> |
| Expanded clay   | 0.254 <sup>ab</sup> | 0.177 <sup>de</sup>  | 0.146 <sup>f</sup>   |
| Biochar         | 0.262 <sup>ab</sup> | 0.177 <sup>de</sup>  | 0.154 <sup>ef</sup>  |
| Zeolite         | 0.277 <sup>a</sup>  | 0.185 <sup>d</sup>   | 0.162 <sup>d-f</sup> |

C0 – uncontaminated soil, Cd – cadmium ion, Co – cobalt ion. Homogeneous groups denoted with letters (a-g).

**Table S7.** Alkaline phosphatase activity,  $\text{mmol PNP kg}^{-1} \text{h}^{-1} \text{kg}^{-1}$  d.m. of soil

| Object          | C0                  | Cd                  | Co                  |
|-----------------|---------------------|---------------------|---------------------|
| Control         | 1.349 <sup>cd</sup> | 0.568 <sup>k</sup>  | 0.814 <sup>h</sup>  |
| Molecular sieve | 1.406 <sup>bc</sup> | 0.682 <sup>i</sup>  | 1.306 <sup>d</sup>  |
| Halloysite      | 1.404 <sup>bc</sup> | 0.581 <sup>jk</sup> | 0.874 <sup>gh</sup> |
| Sepiolite       | 1.544 <sup>a</sup>  | 0.649 <sup>ij</sup> | 1.049 <sup>e</sup>  |
| Expanded clay   | 1.424 <sup>b</sup>  | 0.574 <sup>k</sup>  | 0.909 <sup>g</sup>  |
| Biochar         | 1.574 <sup>a</sup>  | 0.589 <sup>jk</sup> | 1.117 <sup>e</sup>  |
| Zeolite         | 1.578 <sup>a</sup>  | 0.644 <sup>ij</sup> | 0.980 <sup>f</sup>  |

C0 – uncontaminated soil, Cd – cadmium ion, Co – cobalt ion. Homogeneous groups denoted with letters (a-k).

**Table S8.** Acid phosphatase activity, mmol PNP h<sup>-1</sup> kg<sup>-1</sup> d.m. of soil

| Object          | C0                  | Cd                  | Co                  |
|-----------------|---------------------|---------------------|---------------------|
| Control         | 1.275 <sup>de</sup> | 0.812 <sup>h</sup>  | 0.897 <sup>h</sup>  |
| Molecular sieve | 1.593 <sup>b</sup>  | 1.312 <sup>d</sup>  | 1.106 <sup>fg</sup> |
| Halloysite      | 1.483 <sup>c</sup>  | 1.124 <sup>fg</sup> | 1.086 <sup>g</sup>  |
| Sepiolite       | 1.755 <sup>a</sup>  | 1.208 <sup>ef</sup> | 1.129 <sup>fg</sup> |
| Expanded clay   | 1.533 <sup>bc</sup> | 1.055 <sup>g</sup>  | 1.074 <sup>g</sup>  |
| Biochar         | 1.567 <sup>bc</sup> | 1.050 <sup>g</sup>  | 1.036 <sup>g</sup>  |
| Zeolite         | 1.599 <sup>b</sup>  | 1.038 <sup>g</sup>  | 1.078 <sup>g</sup>  |

C0 – uncontaminated soil, Cd – cadmium ion, Co – cobalt ion. Homogeneous groups denoted with letters (a-h).

**Table S9.** Arylsulfatase activity, mmol PNS h<sup>-1</sup> kg<sup>-1</sup> d.m. of soil

| Object          | C0                  | Cd                   | Co                   |
|-----------------|---------------------|----------------------|----------------------|
| Control         | 0.188 <sup>bc</sup> | 0.125 <sup>i</sup>   | 0.144 <sup>f-i</sup> |
| Molecular sieve | 0.218 <sup>a</sup>  | 0.156 <sup>d-h</sup> | 0.170 <sup>c-e</sup> |
| Halloysite      | 0.216 <sup>a</sup>  | 0.140 <sup>g-i</sup> | 0.162 <sup>d-g</sup> |
| Sepiolite       | 0.204 <sup>ab</sup> | 0.132 <sup>hi</sup>  | 0.168 <sup>c-f</sup> |
| Expanded clay   | 0.200 <sup>ab</sup> | 0.144 <sup>f-i</sup> | 0.166 <sup>c-f</sup> |
| Biochar         | 0.202 <sup>ab</sup> | 0.148 <sup>e-i</sup> | 0.170 <sup>c-e</sup> |
| Zeolite         | 0.221 <sup>a</sup>  | 0.131 <sup>i</sup>   | 0.180 <sup>b-d</sup> |

C0 – uncontaminated soil, Cd – cadmium ion, Co – cobalt ion. Homogeneous groups denoted with letters (a-i).

**Table S10.**  $\beta$ -glucosidase activity, mmol PNG h<sup>-1</sup> kg<sup>-1</sup> d.m. of soil

| Object          | C0                   | Cd                   | Co                   |
|-----------------|----------------------|----------------------|----------------------|
| Control         | 0.550 <sup>hi</sup>  | 0.444 <sup>j</sup>   | 0.498 <sup>ij</sup>  |
| Molecular sieve | 0.661 <sup>c-f</sup> | 0.629 <sup>e-g</sup> | 0.641 <sup>d-g</sup> |
| Halloysite      | 0.761 <sup>a</sup>   | 0.663 <sup>c-f</sup> | 0.751 <sup>ab</sup>  |
| Sepiolite       | 0.709 <sup>a-d</sup> | 0.613 <sup>f-h</sup> | 0.583 <sup>gh</sup>  |
| Expanded clay   | 0.665 <sup>c-f</sup> | 0.608 <sup>f-h</sup> | 0.604 <sup>f-h</sup> |
| Biochar         | 0.702 <sup>a-e</sup> | 0.664 <sup>c-f</sup> | 0.660 <sup>c-g</sup> |
| Zeolite         | 0.721 <sup>a-c</sup> | 0.609 <sup>f-h</sup> | 0.681 <sup>b-f</sup> |

C0 – uncontaminated soil, Cd – cadmium ion, Co – cobalt ion. Homogeneous groups denoted with letters (a-j).

**Table S11.** Yield of aboveground parts of sunflower (*Helianthus annuus*), g d.m. on pot<sup>-1</sup>

| Object          | C0                  | Cd                   | Co                   |
|-----------------|---------------------|----------------------|----------------------|
| Control         | 25.27 <sup>b</sup>  | 10.34 <sup>f-i</sup> | 6.78 <sup>i</sup>    |
| Molecular sieve | 27.26 <sup>ab</sup> | 18.63 <sup>c</sup>   | 13.11 <sup>d-f</sup> |
| Halloysite      | 27.66 <sup>ab</sup> | 13.00 <sup>d-f</sup> | 9.12 <sup>g-i</sup>  |
| Sepiolite       | 27.04 <sup>ab</sup> | 16.40 <sup>cd</sup>  | 8.03 <sup>hi</sup>   |
| Expanded clay   | 26.36 <sup>ab</sup> | 14.43 <sup>de</sup>  | 7.99 <sup>hi</sup>   |
| Biochar         | 29.89 <sup>a</sup>  | 12.18 <sup>e-g</sup> | 8.67 <sup>g-i</sup>  |
| Zeolite         | 29.06 <sup>a</sup>  | 11.34 <sup>e-h</sup> | 10.19 <sup>f-i</sup> |

C0 – uncontaminated soil, Cd – cadmium ion, Co – cobalt ion. Homogeneous groups denoted with letters (a-i).

**Table S12.** Sunflower (*Helianthus annuus*) root yield, g d.m. on pot<sup>-1</sup>

| Object          | C0                 | Cd                  | Co                  |
|-----------------|--------------------|---------------------|---------------------|
| Control         | 5.18 <sup>c</sup>  | 1.19 <sup>f</sup>   | 1.56 <sup>d-f</sup> |
| Molecular sieve | 5.89 <sup>c</sup>  | 2.18 <sup>d-f</sup> | 2.53 <sup>d</sup>   |
| Halloysite      | 7.63 <sup>a</sup>  | 1.40 <sup>ef</sup>  | 1.89 <sup>d-f</sup> |
| Sepiolite       | 6.06 <sup>bc</sup> | 2.24 <sup>d-f</sup> | 2.32 <sup>de</sup>  |
| Expanded clay   | 5.63 <sup>c</sup>  | 2.07 <sup>d-f</sup> | 1.73 <sup>d-f</sup> |
| Biochar         | 5.80 <sup>c</sup>  | 1.72 <sup>d-f</sup> | 2.04 <sup>d-f</sup> |
| Zeolite         | 7.15 <sup>ab</sup> | 1.63 <sup>d-f</sup> | 2.19 <sup>d-f</sup> |

C0 – uncontaminated soil, Cd – cadmium ion, Co – cobalt ion. Homogeneous groups denoted with letters (a-f).
